# Supplementary material for: Hepatic Transcriptome Profiles of Mice with Diet-Induced Nonalcoholic Steatohepatitis Treated with Astaxanthin and Vitamin E
Source: Int J Mol Sci. 2017 Mar 8;18(3):593. doi: 10.3390/ijms18030593 (PMC5372609; doi:10.3390/ijms18030593)
Supplement: Supplementary file 1 [file ijms-18-00593-s001.zip › ijms-177044-Table S1.xlsx]

## Sheet: Sheet1
Supplemental Table S1 Upstream regulators predicted to be altered in the liver of mice with diet-induced NASH1
Upstream Regulator	Molecule Type	Predicted Activation State	Activation z-score	p-value of overlap	Target molecules in dataset
cholic acid	chemical - endogenous mammalian	Activated	2.474	2.91e-06	ABCB1,ABCB11,ABCC2,ABCC3,ABCG5,ABCG8,APOM,CYP3A5,CYP7A1,CYP7B1,CYP8B1,DHCR7,EPHX1,FABP1,FDFT1,G6PC,HMGCR,NR1I2,PON1,SLC10A1,SQLE,SREBF1,SREBF2
SQSTM1	transcription regulator	Activated	2.673	0.0143	ATM,FGL2,GSTM5,IL15,IL15RA,IL1B,IRF1,LHX2,PLAT,PLK2,RILPL1,RSAD2,TSC22D1,USP12
ZC3H14	other	Activated	2.53	0.01	FGL2,IL15,IL15RA,LHX2,MERTK,PLAT,RBL1,RILPL1,TSC22D1,USP12
DOCK8	other	Activated	4.49	0.00424	ATM,CCL4,CCND2,CD40,CMPK2,CXCL10,Cxcl9,FGL2,IFIT2,IL15,IL15RA,IRF1,IRF7,ISG20,MERTK,NFKBIZ,PELI1,PLAT,RBL1,RGS1,RILPL1,RSAD2,SAP30,SH3BP5,STAT1,TCF4,TLR3,TRIM21,TSC22D1,USP12,USP25
SIRT6	enzyme	Activated	2.153	0.0815	AACS,DBP,ELOVL1,ELOVL6,G6PC,HMGCR,LSS,LYPLA1,Plpp1,PLPP3,SCD,SREBF2
RICTOR	other	Activated	9.767	3.52e-24	ATP5A1,ATP5D,Atp5e,ATP5F1,ATP5G1,ATP5G3,ATP5H,ATP5J2,ATP5L,ATP5O,ATP6V0A1,ATP6V0A2,ATP6V0B,ATP6V0D2,ATP6V1A,ATP6V1B2,ATP6V1C1,ATP6V1D,BCL2L1,COX4I1,COX5A,Cox5b,COX6A1,COX6B1,Cox6c,COX7A2,COX7A2L,CYC1,FAU,G6PC,GCK,IGFBP1,IL7R,LEPR,LHPP,MCL1,MRPL13,NAT8,NDUFA1,NDUFA2,NDUFA3,NDUFA4,NDUFA5,NDUFA6,NDUFA7,NDUFA9,NDUFAB1,NDUFB10,NDUFB2,NDUFB3,NDUFB5,NDUFB7,NDUFB8,NDUFB9,NDUFC2,NDUFS1,NDUFS2,NDUFS3,NDUFS…
SLC51A	transporter	Activated	2.219	0.0349	ABCC2,ABCC3,CYP3A5,CYP7A1,NR1I3
IL33	cytokine	Activated	2.152	0.282	ARG1,Ccl2,CD86,CLEC4E,CXCL10,CXCL3,EGR2,HCK,IL1B,PLCG1,ZC3H12A
MAVS	other	Activated	2.36	0.432	CCL5,CMPK2,CXCL10,IFIT2,IL1B,IRF7,ISG20,RSAD2,STAT1
TMEM173	other	Activated	2.333	0.379	CCL5,CXCL2,Cxcl9,HOPX,IFI16,IL1B,IL33,Serpina3g (includes others),UPP1
TLR7	transmembrane receptor	Activated	2.638	0.327	BCL2A1,CCL5,CD40,CD86,CXCL2,CXCL3,ETS2,IRF7,RSAD2,SOD2,TNFAIP3
STAT1	transcription regulator	Activated	4.138	0.000444	ABCA1,ACOD1,APOBEC3B,AXL,BTG1,C3,CASP6,CCL5,CD40,CD86,CXCL10,Cxcl9,CYP2C8,Cyp2d9 (includes others),CYP2E1,CYP3A5,CYP4A11,FGL2,GBP2,GBP3,ICAM1,IFIT2,IGF1,IL15,IL15RA,IRF1,IRF7,IRF8,ITGAX,Klrk1,PDGFRB,PPARGC1B,SMAD7,SOCS3,SREBF1,TLR4,TNFSF10
PROCR	other	Activated	2.425	0.0315	GBP2,GBP4,GBP6,IRF8,MALT1,PELI1
RIPK2	kinase	Activated	3.304	1.37e-05	ABCA1,ABCG5,ACADM,ACOD1,ACSL1,CD40,CD86,CLEC4E,CXCL10,CXCL2,CYP7A1,DGAT1,DGAT2,FABP1,Ggta1,HMGCR,ICAM1,LDLR,MARCKSL1,MEFV,MTTP,PDE4B,PNPLA2,RASGRP1,RASGRP3,SCAP,SCD,SLC27A1,SOD2,SREBF1,TANK
SOX4	transcription regulator	Activated	3.019	0.01	Acot1,ACY3,ADGRE5,Akr1c12/Akr1c13,ARNT,BCAR3,BCL2,BEX3,CASP1,Ccl9,CD1D,CD53,CD74,CNRIP1,CSNK1E,Dst,EMB,EMP1,EVI2A,EVL,FCER1G,FHL1,GCAT,GLDC,GRB7,HIPK2,HLA-DQB1,IFI30,IGF1,IGFBP4,KANK1,KDM7A,LHFP,LUZP1,Ly6a (includes others),LY6D,LYZ,MAGED1,MARCKSL1,Mt1,NAV1,NREP,NUAK1,PARD6G,PLEKHA1,PPIC,PXYLP1,RARRES1,RNF144A,S100a11,SMAD1,SNN,SORT1,Tmsb4x (includes others),Tpm4,TUBA1A,VOPP1
IRF8	transcription regulator	Activated	2.306	0.161	BAX,BCL2L1,CBL,CCL5,CCR2,CD40,CD83,CD86,CXCL16,ICAM1,IL15,IRF8,MAP4K4,MDM2,Pmaip1,PML,TLR3
STAT4	transcription regulator	Activated	2.514	0.0101	ACADL,BCL2,BCL2L1,CCR5,CDKN1B,Ctla2a/Ctla2b,CXCL2,CXCL3,ETV5,FURIN,GCNT2,IFIH1,IFIT2,IL18R1,ISG20,KDM6B,MAP3K8,Ms4a4b (includes others),PLAC8,PRDM1,SELPLG,STAT1,TIMP1,Trim30a/Trim30d
PPP2CA	phosphatase	Activated	2.828	0.326	Ccl2,CXCL10,CXCL3,Cxcl9,GZMA,IRF7,SLAMF8,UPP1
IL27	cytokine	Activated	2.097	1	AHR,CFLAR,EGR2,ICAM1,ICOS,MAF,PRDM1,SOCS3
TLR4	transmembrane receptor	Activated	4.287	2.53e-06	APOBEC3B,ATM,BAMBI,CAST,Ccl2,CCL3L3,CCL4,CCL5,CCND2,CD40,CD86,CFLAR,CMPK2,CTSK,CXCL10,CXCL2,CXCL3,Cxcl9,CYP3A5,CYR61,DNMT3A,E2F5,EBI3,FGL2,HMOX1,ICAM1,IFI16,Ifi47,IFIT2,IL15,IL15RA,IL18BP,IL1B,IRF1,IRF2,IRF7,Irgm1,ISG20,LHX2,LZTFL1,MARCO,MERTK,MIF,NAT6,NFKBID,NFKBIZ,NR1I3,PELI1,PLAGL1,PLAT,PLK2,PML,RBL1,RGS1,RILPL1,RIPK2,RSAD2,RXRA,SAP30,SCARB1,SH3BP5,SLA,SOCS3,STAT1,STAT5A,TCF4,TFRC,TGFB1,TLR2,T…
EHHADH	enzyme	Activated	2.72	0.00102	ABCD3,ACAA1,ACOT2,ACOX1,ACSL1,CYP4A11,Cyp4a14,LY6D,MGLL,PEX11A,SCP2
IFNAR1	transmembrane receptor	Activated	2.635	0.000478	ACOD1,ARG1,AXL,CCL5,CD40,CIITA,CLIC5,CXCL10,HMGCR,HMGCS1,IDI1,IFNGR1,IL15,IL1B,IRF7,Ly6a (includes others),Ms4a4b (includes others),PLAT,RSAD2,RTP4,SDC1,Sp100,SQLE,SREBF2
PHLPP1	enzyme	Activated	2.236	0.116	CXCL2,CXCL3,IL15,LHX2,USP12
PCK1	kinase	Activated	2.236	0.0349	ACADL,ACADM,ACADVL,ACOX1,CRAT
SPI1	transcription regulator	Activated	2.896	0.189	ADGRE1,CD1D,CIITA,CSF1R,CYBB,FOXO1,Foxp1,IKZF1,IL7R,KIT,KLF13,LYZ,MCM3AP,MEF2C,P2RY10,PTPRC,TLR4
HSD11B1	enzyme	Activated	2.219	0.241	ACOX1,APOA1,CPT1A,PPARA,SREBF1
mir-223	microrna	Activated	4.646	0.000382	ALCAM,APOBEC1,CD180,CD93,CLEC4E,CSF1,EGR2,EGR3,EMP1,FAM20C,FGL2,GALC,GPR65,Gstm3,GSTM5,ID2,IFI16,Ifitm6,IGF1,IGF1R,IL1RN,LPL,Ly6a (includes others),LY96,MMP13,MREG,NDRG2,POSTN,PURB,S100A6,Serpina3g (includes others),SGPL1,SLC16A7,SLC29A1,SLC40A1,SOAT1,TGFBI,Tlr13,TLR4,TOB1
F2RL1	g-protein coupled receptor	Activated	2.449	0.0947	FPR2,GBP2,GBP4,GBP6,IRF8,PELI1
CD44	enzyme	Activated	4.315	0.00969	ADAM8,Ccl2,CCL4,CCL5,CCR2,CCR5,CD8A,CIDEC,CLEC7A,COL1A1,COL3A1,COL5A2,CXADR,CXCL6,Cxcl9,ITGA4,ITGAX,LGALS3,Ly6a (includes others),LY6D,MMP12,MMP13,MOGAT1,THBS1,THBS2,VCAM1
PTGER2	g-protein coupled receptor	Activated	3.011	1	CFP,CLEC4D,CLEC6A,CXCR4,EXOC7,FPR1,IL1B,ITGAL,KLRD1,MKI67,NEK2,NFKBID,PABPN1,PILRB,RRN3,THBS1
SAMSN1	other	Activated	4.841	0.000614	ATM,CCL3L3,CCL4,CCND2,CD40,CMPK2,CXCL10,CXCL2,Cxcl9,FGL2,IFIT2,IL15,IL15RA,IRF1,IRF2,IRF7,ISG20,LHX2,LZTFL1,MARCO,MERTK,NFKBIZ,PELI1,PLAT,PML,RBL1,RILPL1,RSAD2,SAP30,SDC1,SH3BP5,SOCS3,STAT1,STAT5A,TCF4,TLR3,TRIM21,TSC22D1,USP12,USP25,ZC3H12A
CDKN2A	transcription regulator	Activated	3.176	1	C3,Ccl2,CCL3L3,CCL4,CCL5,Ccl9,CXCL10,CXCL13,CXCL6,Cxcl9,IL15,IL1B,IL2RG,TLR4
IL21	cytokine	Activated	5.271	0.0162	BCL2,BCL2L1,CASP1,CCL3L3,CCL4,CCL5,CCND2,CD86,CDKN1B,CLIC5,CMPK2,EIF2AK2,FAM26F,FCER1G,FGL2,GBP6,HERC6,HLA-DRB5,ID2,IFI16,IFIT2,IL7R,IRF7,Irgm1,KLRD1,Klrk1,MMP12,PRDM1,PSMB9,RORA,RSAD2,Serpina3g (includes others),SLFN13,SOCS3,Tgtp1/Tgtp2
APP	other	Activated	3.049	5.68e-09	AXL,Ccl2,CCL3L3,CCL4,CCNG2,CD40,CMPK2,CP,Ctla2a/Ctla2b,CXCL10,Cxcl9,CXCR4,CYBB,FAM49A,GAB1,GBP2,GBP4,GBP6,HERC6,HERPUD1,HGF,HIVEP3,ICAM1,IFI16,IFI35,Ifi47,IFIH1,IFIT2,IGF1,IGF2BP2,IRF1,IRF7,Irgm1,ISG20,LHFPL2,LPAR6,MAFB,MAFF,MERTK,MME,MMP13,MXI1,NBR1,NCF1,PARP14,PDGFB,PDK2,RNASEL,RSAD2,RTP4,S1PR1,SAP30,Serpinb6b,SLAMF8,SLFN13,ST8SIA4,STXBP4,TBC1D4,Tgtp1/Tgtp2,TLR2,TNFSF10,TOR3A,TP53INP1,TRIM21,XA…
CSF2	cytokine	Activated	2.825	0.0294	Ccl2,CCL3L3,CCND1,CCR5,CD14,CD276,CD40,CD83,CD86,CD8A,CDKN1B,CLEC6A,CLEC7A,CXCL10,DOK2,HLA-DQB1,ICAM1,ICOS,IL15,IL1B,IRF2,ITGAX,LAMP2,MME
CD40LG	cytokine	Activated	2.313	0.178	CCR1,CCR5,CD40,CD86,CD8A,HLA-DQB1,IL13RA1,IL1B,MCL1,NFKB1,NFKBIE,PRDM1,TNFRSF11B,XIAP
IL2	cytokine	Activated	2.713	0.139	ABCA1,ABCC1,ADAM8,AHR,ANXA1,BCL2,BCL2L1,CCL4,CCL5,CCR1,CCR2,CCR5,CD40,CD44,CD8A,CD9,CDKN1B,CFLAR,CSF1,CXCL10,CXCL3,Cxcl9,CXCR6,DSG2,ENTPD1,FGL2,GFRA2,GNAQ,GRN,IFNGR1,IFNGR2,IL17RB,IL7R,ITGA6,Ly6a (includes others),NAV1,NDRG1,Pcmt1,PELI1,PLAC8,RPS6KA5,RXRA,SELPLG,SHE,SWAP70,TGFBR1,VIM
TNF	cytokine	Activated	6.256	5.01e-05	ABCA1,ALB,BAX,Ccl2,CCL3L3,CCL4,CCL5,CCR1,CCR5,CD40,CD44,CD83,CD86,CFLAR,COL1A1,CSF1,CTSK,CXCL10,CXCL13,CXCL2,CXCL3,Cxcl9,CYP2C8,F3,FPR1,FPR2,FYN,GBP2,GLS,GRN,Gsta4,HMOX1,ICAM1,ICOS,IKBKE,IL1B,IL7R,IRF1,IRF8,ITGA4,ITGB1,ITGB2,MMP13,NCF1,NCF2,NFATC1,NFKB1,NLRP12,NR1H4,NR3C1,PPARA,PRDM1,RPS6KB1,RXRA,SCARB1,SLC27A1,SOCS3,SOD1,TLR2,TNFAIP3,TNFSF10,TSC22D3,USP2,VCAM1
MET	kinase	Activated	3.003	0.0104	ATM,CCL3L3,E2F5,FGL2,Hspa1b,IL15,IL15RA,MAD2L1,MDM2,MERTK,NFKBIZ,NOX4,PLK2,RILPL1,SH3BP5,SLA,SOCS3,SOD1,SOD2,TLR3,TRIM21,TSC22D1
MMP13	peptidase	Activated	2	0.0362	Ccl2,CCL4,COL1A1,TGFB1
IRF7	transcription regulator	Activated	3.879	0.224	CMPK2,CXCL10,FAM26F,FCGR1A,IFI16,Ifi47,IFIH1,IFIT2,IL15,IRF7,Irgm1,ISG20,Ms4a4b (includes others),PARP14,PLAC8,RSAD2,SAMD9L,SAP30,STAT1,Trim30a/Trim30d
NOD2	other	Activated	2.921	0.0626	ACOD1,ACSL1,CD40,CLEC4E,CXCL10,Ggta1,ICAM1,IL1B,MARCKSL1,MEFV,PDE4B,RASGRP1,RASGRP3,SOD2,TANK
PML	transcription regulator	Activated	2.837	2.58e-06	ACACB,ACADL,ACADM,ACADS,ACOX1,APOA1,APOE,CPT1A,FABP1,FTL,HADHB,HMGCR,IL1B,LDLR,LPL,NFE2L2,SCD,SLC25A20,SREBF1,SREBF2,TXN2
MYD88	other	Activated	6.033	2.37e-07	ACOD1,ACSL1,AK3,ALDH1A1,APOBEC3B,ARG1,BAMBI,CASP4,Ccl2,CCL3L3,CCL4,CCL5,CCNL2,CD14,CD38,CD40,CD83,CD86,CFLAR,CLIC4,CMPK2,CTSK,CXCL10,CXCL13,CXCL2,CXCL3,CXCL6,Cxcl9,CYR61,DNMT3A,EBI3,EDNRB,ETS2,FPR1,FPR2,Gdap10,GDF15,ICAM1,IFIT2,IKBKE,IL1B,IL1RN,IRF1,IRF7,ITGA4,ITGAX,ITPR2,JAG1,LZTFL1,MAFF,MARCO,MEFV,MKI67,MRC1,Ms4a4b (includes others),NFKB1,NFKBIZ,PDE4B,PILRA,PLCG1,Plpp1,RSAD2,SAMHD1,SCARB1,SH3BP…
SYK	kinase	Activated	2.219	0.387	CCL4,CXCL10,Cxcl9,FGL2,TSC22D1
IFIH1	enzyme	Activated	2.157	0.461	Bst2,LCK,Ly6a (includes others),RND3,TANK
HSD17B4	enzyme	Activated	2.72	0.00102	ABCD3,ACAA1,ACOT2,ACOX1,ACSL1,CYP4A11,Cyp4a14,LY6D,MGLL,PEX11A,SCP2
PTPRE	phosphatase	Activated	2.646	0.114	CXCL2,CXCL3,Cxcl9,MARCO,SLA,STAT5A,TSC22D1
TICAM1	other	Activated	6.024	4.26e-12	ACOD1,ACSL1,AK3,APOBEC3B,CASP4,Ccl2,CCL3L3,CCL4,CCL5,CCNL2,CD38,CD40,CD86,CFLAR,CMPK2,CXCL10,CXCL13,CXCL2,CXCL3,CXCL6,EDNRB,ETS2,FPR1,FPR2,Gdap10,GDF15,ICAM1,IFI16,Ifi47,IFIT2,IKBKE,IL15,IL15RA,IL18BP,IL1B,IRF1,IRF7,Irgm1,ISG20,ITPR2,JAG1,LZTFL1,MAFF,MEFV,MKI67,Ms4a4b (includes others),NFKB1,NFKBIZ,PDE4B,PELI1,PILRA,Plpp1,RHOB,RIPK2,RSAD2,SAMHD1,SLC7A2,SOCS3,TLR2,TLR3,TNFAIP3,TNFSF10,TOR1AIP2,TSC…
MAPKAPK2	kinase	Activated	2.331	0.167	CCL3L3,CXCL10,IRF3,MARCO,MSR1,PLAT,RILPL1,SLA,STAT5A,TLR3,TSC22D1,ZC3H12C
S100A4	other	Activated	2	0.302	CCL5,Ccl9,CXCL3,VCAM1
S1PR2	g-protein coupled receptor	Activated	2.777	0.00582	Ccl2,F3,ICAM1,PDGFB,S1PR2,TGFB1,TIMP1,VCAM1
GNAI2	enzyme	Activated	2	0.0819	CCR5,CXCR4,ITGA4,ITGAL
MARK2	kinase	Activated	2.121	1	CD44,CXCL2,CXCL3,IL15,IRF1,NFKBIZ,RILPL1,RSAD2
CYBB	enzyme	Activated	2	0.116	Ccl2,CCL5,CXCL10,CXCL3,IL1B
IRF1	transcription regulator	Activated	2.394	0.245	BCL2,CASP1,CCL5,CD40,CXCL16,FGL2,GBP2,IL18BP,MAP4K4,PIGR,PML,TGFB1,TLR3
PTPRJ	phosphatase	Activated	4	0.286	CCL3L3,CCL4,CXCL2,CXCL3,FGL2,LHX2,LZTFL1,MARCO,MERTK,NFKBIZ,PLAGL1,PLAT,RILPL1,SLA,TSC22D1,ZC3H12A
IL1A	cytokine	Activated	2.55	0.0635	Ccl2,CCL4,CCL5,CTSK,CXCL10,CXCL6,CYP2E1,CYP3A5,HSPG2,VCAM1
NEK6	kinase	Activated	2	0.302	CXCL10,FGL2,RGS1,RILPL1
CCL5	cytokine	Activated	2.393	0.141	CCL3L3,CCL4,CCL5,CD40,CXCL2,CXCL3
IL18	cytokine	Activated	2.557	1	Ccl2,CD40,CD44,IL18R1,IL1B,NFKBIZ,VCAM1
SMAD3	transcription regulator	Activated	2.377	0.135	ALB,CCND2,CDK4,COL1A1,COL1A2,FPR2,HP,ITGB1,LGALS9B,SLC51B,TF,TGFB1
SASH1	other	Activated	4.49	0.00955	ATM,CCL4,CCND2,CD40,CMPK2,CXCL10,FGL2,IFIT2,IL15,IL15RA,IRF1,IRF7,ISG20,MARCO,MERTK,NFKBIZ,PELI1,PLAT,PML,RBL1,RILPL1,RSAD2,SAP30,SH3BP5,STAT1,TCF4,TLR3,TRIM21,TSC22D1,USP12,USP25
ICOS	transmembrane receptor	Activated	2	1	CXCR4,MAF,MKI67,NFATC1
TLR9	transmembrane receptor	Activated	2.409	0.0574	ACOD1,CAST,CCL5,CD40,CD86,CSF1,CXCL10,CXCL3,EBI3,IL1B,IRF7,LAMP2,PRDM1,RAB7B,RSAD2,SDC1,TGFB1
IRF3	transcription regulator	Activated	4.334	0.115	APOBEC3B,CCL5,CLIC4,CMPK2,CXCL10,Cxcl9,FAM26F,FCGR1A,IFI16,Ifi47,IFIH1,IFIT2,IL15,IRF7,Irgm1,ISG20,Ms4a4b (includes others),PARP14,PLAC8,RSAD2,SAMD9L,SAP30,STAT1,Trim30a/Trim30d
PLK2	kinase	Activated	2.668	0.00018	ATM,CD40,CMPK2,CXCL10,Cxcl9,FGL2,IFIT2,IL15,IL15RA,IL1B,IRF1,MARCO,MERTK,PLAT,RBL1,RGS1,USP12
NR0B2	ligand-dependent nuclear receptor	Activated	2.359	0.000831	ACADM,ACOX1,APOM,CPT1A,CYP7A1,CYP8B1,G6PC,HNF4A,SREBF1
NFATC2	transcription regulator	Activated	4.021	0.0551	ABCA1,ATM,CD40,CDK4,CMPK2,CXCL10,CXCL3,E2F5,FGL2,ICOS,IFIT2,IL15,IRF1,IRF7,ISG20,MAF,MERTK,NAT6,NFKBIZ,PELI1,PLAT,PLK2,PML,RGS1,RILPL1,RSAD2,SH3BP5,SOCS3,STAT1,TCF4,TLR3,TSC22D1,USP25
PLG	peptidase	Activated	2.891	0.203	CLEC7A,CLIC4,FCGR2B,FYN,MERTK,MFGE8,MIF,MMP12,PIP5K1A,RALB,RHOA,STAB2
IFNB1	cytokine	Activated	4.258	2.03e-06	ACOD1,AGL,APOBEC1,AXL,Bst2,Ccl2,CCL5,CD274,CD40,CD86,CLEC4E,CMPK2,CREM,Ctla2a/Ctla2b,CXCL10,CXCL2,DDX3Y,F2R,FBN1,GBP2,GBP6,HMGB2,HMGCR,HMGCS1,IDI1,IFI16,Ifi27l2a/Ifi27l2b,Ifi47,IFIH1,IFIT2,IFNGR1,IRF1,IRF7,Irgm1,ISG20,LAMB1,MCM10,NFIX,NFKBIE,NID2,Nisch,NNMT,NOCT,NOD1,OGN,RIPK2,RND3,RSAD2,SIRPB1,SLC39A14,SLFN13,SQLE,SREBF2,STARD4,STAT1,THBS1,THBS2,TLR3,TNFSF10,Tpm2,TRIM21,Trim30a/Trim30d,TRIM6-TRI…
NFKB1	transcription regulator	Activated	2.264	0.0265	BCL2,BCL2A1,BCL2L1,Ccl2,CCND2,CD40,CD86,CSF2RA,CXCL3,EBI3,ICAM1,IKBKG,IL1B,MAP3K8,MCL1,MSR1,RPS6KB1,STAT1,TLR2,TNFSF10
RELA	transcription regulator	Activated	2.219	1	CD14,CD40,IL1B,NFKB1,PRDM1,SMAD7,TLR2
IL15	cytokine	Activated	2.444	1	AHR,BCL2,Ccl2,CCR2,CD40,CD44,CD86,CD8A,CPT1A,CXCL2,IL7R,KLRD1,PRDM1,S1PR1,TIMP1
IFNG	cytokine	Activated	5.48	1.13e-07	ABCA1,ABCB1,ACOD1,ACTB,AGPAT1,AHR,ALOX5AP,ARG1,ARL6,ARPP19,ATP1B1,BCL2,BLNK,Bst2,BTG1,C2,C3,CASP4,CASP7,Ccl2,CCL3L3,CCL4,CCL5,CCND2,CCR1,CCR2,CCR5,CD274,CD276,CD40,CD44,CD5L,CD74,CD86,CEBPB,CFLAR,Chil3/Chil4,CIITA,CLEC4E,CLEC7A,CLIC4,COL5A2,CREM,CSF1,CXCL10,CXCL2,CXCL3,Cxcl9,CXCR4,DEGS1,DIABLO,EBI3,EDNRA,F2R,F3,FAH,FCGR1A,FCGR2B,FCGR3A/FCGR3B,FECH,FGF1,FGL2,FTL,GBP2,GBP3,HAAO,Hbb-b2,HCK,HLA-DQA1,…
TBK1	kinase	Activated	4.092	0.0038	ATM,CCL3L3,CCL4,CD40,CMPK2,CXCL10,CXCL2,CXCL3,Cxcl9,FGL2,IFIT2,IL15,IL15RA,IRF7,ISG20,MARCO,NFKBIZ,RBL1,RILPL1,RSAD2,SH3BP5,TLR3,TSC22D1,ZC3H12A
TNFRSF1A	transmembrane receptor	Activated	2.236	1	ABCC1,ABCC3,Ccl2,GHR,ICAM1,IL1B,VCAM1
CD40	transmembrane receptor	Activated	2.254	0.051	ANPEP,BCL2,BCL2A1,BCL2L1,CCL4,CCL5,CCND1,CCND2,CD40,CD86,CD8A,CDK4,CXCL10,Cxcl9,F3,HLA-DQB1,ICAM1,IL1B,IL1RN,ITGB2,LGALS3,LTBR,Ly6a (includes others),MCM3AP,PRDM1,TNFRSF11B
TYROBP	transmembrane receptor	Activated	2.646	0.118	CD40,CD83,CD86,FCGR2B,GPX1,ICAM1,ITGAX,ITGB1,NCKAP1L,RBM47
ITK	kinase	Activated	3.615	0.161	AHR,BAX,BIK,CCL5,CD44,CRIM1,F2R,FCER1G,HLA-A,IFNGR1,IL10RA,ITGA1,KLRD1,Klrk1,LPAR6,Ly6a (includes others),LYN,MAF,MYO1F,PREX1,PRKCB,PTEN,Serpina3g (includes others),SULF2,TF,TIRAP,TNFSF10,ZBTB16
ARHGAP21	other	Activated	3.441	0.041	ATM,CXCL10,CXCL2,Cxcl9,FGL2,IL15,IL15RA,IRF1,ISG20,MERTK,NFKBIZ,PLAT,RBL1,RILPL1,SH3BP5,TCF4,TLR3,TRIM21,TSC22D1
SPIB	transcription regulator	Activated	2.711	0.112	APOE,ARHGAP6,Bst2,CCR2,CCR5,CD300C,EGR2,FAM46C,GEM,HSPA1A/HSPA1B,Hspa1b,KDM6B,KIT,KLF6,LILRB3,MARCH1,MBD2,NET1,P2RY10,PTPRF,RAD51B,SLAMF9,ZC3H13
IL6	cytokine	Activated	2.304	0.0213	ABCB11,ABCC2,ABCC3,ACOX1,ADGRE1,AHR,ANXA1,APP,ARG1,BAX,BCL2,BCL2L1,BGN,C3,Ccl2,CCND1,CCR5,CD14,CD38,CD68,CSF1,CYP2C8,CYP3A5,EGR2,F3,Gsta4,HP,IGFBP1,IKBKE,IL1RN,IL6ST,IL7R,KLRD1,LIFR,MAF,NR1H4,NR3C1,RORA,SLC10A1,SLC39A14,SMAD7,SOCS3,SOCS5,STAT3,TNFSF10
IRF5	transcription regulator	Activated	2.398	0.432	CMPK2,CXCL10,CXCL2,IFIH1,IFIT2,IRF7,ISG20,RSAD2,STAT1
IL1B	cytokine	Activated	3.145	0.00149	ADAMTS5,BCL2,BCL2L1,BGN,C3,Ccl2,Ccl9,CD14,CD83,CEBPB,CSF1,CXCL10,CXCL2,CXCL3,CXCL6,Cxcl9,DR1,ETS2,F3,GBP2,GRB7,HES1,HK2,HMOX1,HP,HSPA1A/HSPA1B,ICAM1,ID3,Ifi47,IGF1,IGFBP1,IKBKE,IL15RA,IL1B,IL1RN,IRF1,LDHA,MARCKSL1,MEF2C,NFE2L2,NFKB1,NFKBIZ,NOCT,NR1H4,PDK1,PFKP,PLK3,PLSCR1,PTP4A1,RCAN1,RHOB,S100A6,SAA2-SAA4,SCARB1,SERPINF2,SOCS3,STAT3,STAT5A,TGM2,Tgtp1/Tgtp2,TNFAIP2,TNFAIP3,UBE2V2,VCAM1
TNFSF15	cytokine	Activated	2.219	0.0693	CD40,CD83,CD86,CXCL2,Klrk1
RGS1	other	Activated	2.121	0.0408	CCL3L3,CXCL2,Cxcl9,IL15,IL15RA,LHX2,RBL1,SLA
Map3k7	kinase	Activated	2.602	0.00127	CCL3L3,CCL4,CCL5,CMPK2,CXCL10,Cxcl9,FGL2,IFIT2,IL15,IL15RA,IL1B,ISG20,NFKBIZ,RILPL1,RSAD2,TLR3,TSC22D1
PLK4	kinase	Activated	2.668	8.15e-05	ATM,CD40,CMPK2,CXCL10,Cxcl9,FGL2,IFIT2,IL15,IL15RA,IL1B,IRF1,MARCO,MERTK,PLAT,RBL1,RGS1,USP12
cholesterol	chemical - endogenous mammalian	Activated	5.454	5.14e-13	ABCA1,ABCG1,ABCG5,ABCG8,Acaa1b,Acot1,ADAM11,AQP8,C1QC,Ccl2,CD5L,CD68,Ces2a,COL1A1,COL3A1,CTSK,CXCL10,CXCL2,CYB5B,CYP3A5,CYP7A1,DBI,DHCR7,EPHX1,FADS1,FBXO3,FDFT1,FDPS,GNMT,GSTA5,HES6,HLA-DRB5,HMGCR,HMGCS1,IDI1,IL1B,LAPTM5,LYZ,ME1,MITF,MMP2,MPEG1,MSMO1,NSDHL,PCSK9,PCYT2,PMVK,RPL36AL,RPS28,SAA2-SAA4,SCARB1,SQLE,SREBF1,SREBF2,STARD4,STARD5,TGFB1,THBS1,TIMP1,TIMP3,TM7SF2,TMEM123,UQCRHL,UXT,ZFPM2
PNPLA2	enzyme	Inhibited	-2.219	0.0134	ACADL,Acot1,ACSL1,CPT1A,PPARA
ZMPSTE24	peptidase	Inhibited	-2.003	0.00425	DIO1,Esrra,GHR,IGF1,IGF1R,IGFALS,IGFBP1,IGFBP3,JAK2,SIRPA,SOCS3,SOCS5
ABCB4	transporter	Inhibited	-3.71	0.0092	Ccl2,COL1A1,COL1A2,CXCL10,LGALS3,MMP13,MMP2,NFKB1,PDGFA,PDGFRB,SLC10A1,SPARC,TGFB1,TIMP1
ATP7B	transporter	Inhibited	-3.545	0.000109	AACS,CCNG1,Cyp2c40 (includes others),CYP51A1,CYP7A1,ELOVL6,FDFT1,FDPS,HMGCR,HMGCS1,IDI1,LDLR,LPIN1,LSS,MAD2L1,MSMO1,Mt1,PPARA,PTTG1,SMC4,SQLE,SREBF2,TRIP13
HSF1	transcription regulator	Inhibited	-2.673	0.00781	AHSA1,ATG7,BAG3,DNAJA1,DNAJB1,HSP90AB1,HSPA1A/HSPA1B,Hspa1b,HSPA8,HSPE1,IL1B,LMAN2L,MITF,STIP1,TTR
STAT3	transcription regulator	Inhibited	-2.389	0.0156	CASP1,CCL3L3,CCL4,CCL5,CCND1,CCND2,CD274,CD86,CDKN1B,CEBPB,CLIC5,CMPK2,EGR2,EIF2AK2,FAM26F,FCER1G,FGL2,G6PC,GBP6,HERC6,HLA-DRB5,IFI16,IFIT2,IGFBP1,IKZF2,IL1RN,IL6ST,IRF7,Irgm1,Klrk1,LTBR,MAF,PCK1,PRDM1,PSMB9,RORA,RSAD2,SERPINA3,Serpina3g (includes others),SLFN13,SOCS3,SREBF1,TGFB1,Tgtp1/Tgtp2,TIMP1,TNFSF10
ITGB2	transmembrane receptor	Inhibited	-2.236	0.387	BCL2A1,CXCL10,CXCL2,CXCL3,HES1
SCAP	other	Inhibited	-4.869	9.07e-09	AACS,ACAA2,ACACB,ACSL1,ACSL5,ALDOC,CSAD,CYP51A1,DHCR7,ELOVL6,FADS2,FDFT1,FDPS,GPAM,Gstt3,HES6,HMGCR,IDI1,IGHM,INSIG1,LDLR,LSS,MSMO1,MVK,NSDHL,PCSK9,PMVK,SCD,SQLE,SREBF1,SREBF2,STARD4,TM7SF2,TMEM97
VIP	other	Inhibited	-2.743	0.0253	Ccl2,CCL3L3,CCL4,CCL5,CD274,CD40,CD86,CXCL10,CXCL2,CXCL3,IRF1,TLR1,TLR4
PPARD	ligand-dependent nuclear receptor	Inhibited	-3.089	1.42e-09	ALDH9A1,ANGPTL4,C1QA,C1QB,C1QC,Ccl2,CD68,CLEC4F,CLEC7A,CPT2,CSAD,DET1,ECH1,ECI2,FAM32A,FBP1,GSTA5,IKBKE,Irgm1,LGALS4,LIPG,LPIN2,MERTK,MFGE8,MFSD2A,MMD2,MPEG1,MYCL,PCSK6,PCSK9,PCYOX1,PER3,PKLR,PLIN2,PNPLA2,RABL6,S100A6,SERINC2,SLC25A20,SORD,ST3GAL5,STAT1,STBD1,THBS1,Tlr12,TLR5,TMEM120A,TNFRSF12A,Zfp868
RORA	ligand-dependent nuclear receptor	Inhibited	-2.236	4.91e-06	ABCG5,ACACB,ACOT2,AKR1D1,Apoc3,AQP8,ARNTL,ARSG,ASNS,ATP1B1,BHMT,CCL5,CXCL10,Cxcl9,Cyp2b13/Cyp2b9,Cyp2c54 (includes others),Cyp2c70,CYP2C8,CYP2E1,CYP2F1,CYP39A1,CYP3A5,CYP46A1,CYP4A11,Cyp4a14,CYP4F8,CYP7B1,CYP8B1,DHCR24,ELOVL6,FDFT1,Gk,GSTA5,GSTP1,Gstt3,HMGCR,HSD17B7,HSD3B1,IGFBP1,LPIN2,Mt1,Mup1 (includes others),NAT8,NNMT,NOCT,NR1I3,NSDHL,OBP2B,PCK1,POR,PPP1R3C,RDH16,RHBG,RORA,Scd2,SELENBP1,SLC16…
TRAF2	enzyme	Inhibited	-2.309	0.211	ANXA4,CCR1,CHKA,EBI3,ICAM1,ITGB1,LILRB4,MPEG1,NDRG1,PBX3,PDE8A,RSU1,Serpina3g (includes others),TK1
IL10RA	transmembrane receptor	Inhibited	-2.332	3.4e-05	ABCB1,ABCG1,ACOD1,ACSL1,ADD3,ADGRL2,ADH1C,AKT3,ALDH2,ALDOB,ARG2,ARL5A,BMP4,BNIP3,C3,CCL5,CD1D,Ces1f,CLEC4E,COL14A1,CSRP2,Cxcl9,Cyp2c40 (includes others),CYP2F1,CYR61,DCN,DDIT4,DPT,DRAM1,EDNRB,EMP2,ENTPD5,F10,F13A1,FAM26F,FBN1,FHL1,FOLR2,FSTL1,GBP2,GBP6,Gbp8,GDA,Gdap10,GHR,GNE,Gsta4,Gstm3,GSTM5,HGFAC,HK3,HLA-A,HPSE,HSPA8,IFI16,Ifi47,IKBKE,IL15RA,IL18BP,IL1RN,IL2RG,IRF1,IRF7,Irgm1,KITLG,Klrk1,LUM,L…
GFI1	transcription regulator	Inhibited	-2.523	0.196	ATF2,CASP1,Ccl2,CD40,CFLAR,EIF2AK2,F2R,GUSB,HSP90AB1,ICAM1,ID2,IL1B,IL7R,IRF1,LTBR,NFKB1,RASGRP1,RIPK2,STAT1,TOLLIP
TRAF3	enzyme	Inhibited	-2.309	0.55	ANXA4,CCR1,CHKA,EBI3,LILRB4,MPEG1,NDRG1,PBX3,PDE8A,RSU1,Serpina3g (includes others),TK1
AMBP	transporter	Inhibited	-2	0.00968	Ccl2,CXCL2,CXCL3,IL1B
ADCYAP1	other	Inhibited	-2.862	0.00562	Ccl2,CCL3L3,CCL4,CCL5,CD40,CD86,CXCL10,CXCL2,CXCL3
NR1H2	ligand-dependent nuclear receptor	Inhibited	-2.523	0.0169	ABCA1,ABCG1,APOE,Ccl2,CCL4,CCL5,CXCL10,CYP7A1,IL1B,IL1RN,ITGAL,LPL,SREBF1
ARNT	transcription regulator	Inhibited	-2.138	0.00567	ALDOA,ALDOC,BCL2,CCR5,CXCR4,ENO1,G6PC,GAPDH,HK2,LDHA,PCK2,PGK1,S1PR1,TPI1
MED1	transcription regulator	Inhibited	-2.227	0.0657	ACAA1,ACOX1,CCND1,CDK4,CYP3A5,CYP4A11,Cyp4a14,DIO1,FOXO1,Foxp1,GHR,GSTP1,IGF1,IGFBP1,IKZF1,KLF13,LY6D,MAD2L1,NR1I3,PEX11A,PRLR,SCP2,THBS1
THRB	ligand-dependent nuclear receptor	Inhibited	-2.557	0.00608	ABCD3,ATP5L,CYP7A1,DIO1,FABP4,FDPS,G6PC,IGHM,LPL,ME1,NRAS,NUDT7,PER1,PGD,PHYH,PPP2CA,SREBF1,UQCRHL,YWHAE
SOCS1	other	Inhibited	-3.194	0.0995	ACOD1,BAX,BCL2L1,CD1D,CD44,CD86,CXCL10,Cxcl9,GBP6,Gvin1 (includes others),IFI16,IFI44,Ifi47,IFIH1,IFIT2,IL1B,JAK2,SOCS3,STAT1
DNASE2	enzyme	Inhibited	-2.621	0.16	CP,CXCL10,CXCL2,GPNMB,IRF7,Ly6a (includes others),Ms4a4b (includes others),RSAD2,RTP4,SLAMF8,Sp100
ERCC1	enzyme	Inhibited	-2	0.00968	DIO1,GHR,IGF1,PRLR
PTGER4	g-protein coupled receptor	Inhibited	-2.696	3.69e-07	Ccl2,CCL3L3,CCL4,CCNG2,CD40,CMPK2,CP,Ctla2a/Ctla2b,CXCL10,Cxcl9,CXCR4,CYBB,FAM49A,GAB1,GBP2,GBP4,GBP6,HERC6,HERPUD1,HGF,HIVEP3,IFI16,IFI35,Ifi47,IFIH1,IFIT2,IGF2BP2,IRF1,IRF7,Irgm1,ISG20,LHFPL2,LPAR6,MAFB,MAFF,MMP13,MXI1,NBR1,PARP14,PDGFB,PDK2,RNASEL,RSAD2,RTP4,S1PR1,SAP30,Serpinb6b,SLAMF8,SLFN13,ST8SIA4,STXBP4,TBC1D4,Tgtp1/Tgtp2,TNFSF10,TOR3A,TP53INP1,TRIM21,XAF1,ZDHHC14,ZFP36L1
PPARGC1A	transcription regulator	Inhibited	-2.751	0.0092	ACADM,ACAT1,ALAS1,Apoc3,CEBPB,COX4I1,CPT1A,CS,CYP7A1,G6PC,LPIN1,MDH2,PCK1,SDHA
DUSP1	phosphatase	Inhibited	-3.292	0.00292	AACS,CCL3L3,CD40,CD86,CIDEC,CXCL2,CXCL3,IL1B,IL1RN,MEFV,MGLL,MXD1,PAQR7,PEX11A,PLIN2,PRDM1,PTEN,RETSAT,SERPINA12,VNN1,Wfdc21
PIAS4	transcription regulator	Inhibited	-2	0.0362	CXCL2,Cxcl9,IL1B,IRF1
BCL6	transcription regulator	Inhibited	-3.422	0.544	BAX,BCL2,BCL2L1,Ccl2,Ccl6,CCND2,CDKN1B,EBI3,ENTPD1,IL13RA1,IL6R,IL7R,IRF8,Ly6a (includes others),MAF,PRDM1,TGFB1
NFE2L2	transcription regulator	Inhibited	-4.277	5.28e-12	ABCB11,ABCC3,ACSL5,AGPAT3,AKR1A1,AKR7A2,ALAS1,ALAS2,ALDOA,ANG,ATP1A1,B4GALNT1,BCL2L1,BHMT,BNIP3,Ccl2,CCL5,CCT3,CCT7,CD86,CHORDC1,CLPP,COQ7,CREG1,CXCL10,CXCL2,CXCL3,Cyp4a14,CYP4A22,DAD1,DDX39B,DHCR7,DNAJB11,DNAJC3,EIF3C,ENTPD5,EPB41,EPHX1,F10,FABP1,FKBP5,FMO1,FTL,FXYD1,GBE1,GHR,GNA11,GSPT1,GSS,Gsta4,GSTA5,Gstm3,GSTM5,GSTP1,Gstt1,GSTT2/GSTT2B,HACD3,HAX1,HM13,HMBS,HMOX1,HSD3B1,HSP90AB1,HSP90B1,HTATI…
HNF4A	transcription regulator	Inhibited	-2.828	0.0112	ABCB11,Acot1,Apoc3,CCND1,CDH1,CLDN1,CLDN12,CLDN2,CXADR,CYP2E1,CYP3A5,CYP7A1,CYP7B1,CYP8B1,G6PC,GJB1,GJB2,GSN,HNF4A,MLXIPL,MTTP,NR1H4,NR1I2,NR1I3,OCLN,PCK1,PPARA,SCARB1,SCD,SCP2,SDC1,SLC10A1,TOX,TRIM24,UGT1A6,VTN
FOXO1	transcription regulator	Inhibited	-2.517	0.00522	AIFM2,ATG14,Atp5e,ATP5G3,ATP6V0A1,ATP6V0B,ATP6V0D2,ATP6V1D,BAX,BCL2,CCND1,CCNG2,CMC4,CTSK,CYP7A1,G6PC,GZMA,HSPA5,IGFBP1,IKZF2,IL15,IL7R,INSR,KLF7,MRPL46,MRPL47,MRPL55,MRPS12,MRPS2,MRPS7,NAMPT,NDUFA12,NDUFA4,NDUFA7,NDUFA9,NDUFAF4,NFATC1,PCK1,PPARGC1B,SEMA6D,SREBF1
KLF3	transcription regulator	Inhibited	-2.28	8.02e-05	ABCF1,Acot1,ACOT9,AHNAK,ALDH3B1,ANXA5,ANXA6,AP4M1,APOE,APRT,ARFGAP2,ARPC4,BCL2,BTLA,C11orf24,CAMK2D,CAPG,CCT3,CD1D,CD55,CD93,CD99L2,CDK10,CFP,CHCHD10,CMPK2,CSF2RA,CSNK1G3,Cux1,Cyb5r3,DEGS1,DFFA,DIAPH1,DRG1,DTNB,EIF5A,ELOF1,EPRS,EXTL1,FAM126A,FAM49A,FCGRT,GIMAP1-GIMAP5,GNGT2,GRB7,GSTK1,GSTP1,HBP1,HEXB,HM13,HNRNPDL,IDH1,INTS4,ITFG2,JAK2,KCNK6,KDM5C,KLHL6,LILRB3,LMAN2L,LMO2,LRRK2,LY96,MAGED1,MBLAC2,…
USP18	peptidase	Inhibited	-2	0.144	Ccl2,CCL3L3,CXCL10,SOCS3
BCL3	transcription regulator	Inhibited	-2.224	0.387	CD40,CD86,HLA-DQB1,ICAM1,IL1B
APOE	transporter	Inhibited	-2.391	1.37e-05	ABCA1,ABCG8,ACAT1,APOA1,Ccl2,CCR5,CD68,CD86,CPT1A,CSF1,CYP3A5,CYP7A1,CYP8B1,HMGCR,HMOX1,Hspa1b,HSPD1,ICAM1,LDLR,LIPG,LPL,LTBR,MSR1,MYLIP,PCSK9,PLAU,SCARB1,SREBF2,TGFB1,TIMP1,VCAM1
PTPN11	phosphatase	Inhibited	-2	1	CD14,CD68,CEBPA,CSF1
SPARC	other	Inhibited	-3.459	0.039	ACOT2,ARG2,ATM,BRCA2,CDH1,CDYL,CIART,CIDEC,CLDN1,COL1A2,CYP8B1,DVL1,ELMOD3,GPD1,HAT1,MCM6,MMP2,MPZL1,MSH2,NDRG1,PER2,RABL6,SLC22A5,SLC34A2,SOX9,TGFB1,TOPBP1,TRIM2,TRIM25,TSKU,UBLCP1,USP2,ZHX2
INSR	kinase	Inhibited	-3.006	2.13e-05	CYP51A1,DHCR7,FDFT1,FDPS,HMGCR,HMGCS1,IDI1,LEPR,LSS,MSMO1,MVK,NSDHL,SQLE,SREBF2
SMARCB1	transcription regulator	Inhibited	-2.853	8.52e-10	ACAT1,ACSL1,APOA5,APOC4,BAG3,BNIP3,BTG1,C4A/C4B,CA8,CDH1,CIDEB,COL18A1,Cyp2c54 (includes others),Cyp2c70,CYP2C8,Cyp2d26,Cyp2d9 (includes others),CYP2E1,CYP39A1,CYP4A11,Cyp4a14,CYP4F8,CYP8B1,DSG2,ETS2,F10,FABP4,FBP1,G6PC,GJB1,GJB2,GSN,HP,MCM3,Mup1 (includes others),PC,PCK1,PFKFB1,POLA1,PPP1R3C,PRIM1,SKP2,SLC37A4
IKZF1	transcription regulator	Inhibited	-2.734	0.254	ABCA9,AJUBA,ALAS2,AXL,CCND2,CYP7B1,EMP1,HES1,IL18R1,KITLG,LCK,LHFP,LHFPL2,MYO1B,NFIX,NR1H4,PTH1R,SELM,SERPINH1,SH3BP5,SPI1,SULF2,UACA
TRIM24	transcription regulator	Inhibited	-5.458	7.87e-07	BLNK,Bst2,CMPK2,CSRP1,CXCL10,EPSTI1,FAM26F,FBN1,GBP2,GBP3,GBP4,HERC6,Ifi27l2a/Ifi27l2b,IFI35,IFI44,Ifi47,IFIH1,IFIT2,IRF1,IRF7,Irgm1,LGALS3,LGALS3BP,Ly6a (includes others),Ms4a4b (includes others),NUMA1,PLAC8,PLEC,PSMB10,PSMB8,PSMB9,RTP4,S100a11,SAMD9L,SAMHD1,SHISA5,STAT1,TGFBI,Tgtp1/Tgtp2,TLR2,TRIM6-TRIM34
ABCA1	transporter	Inhibited	-2.903	0.0341	APOA1,APOE,Ccl2,CCL3L3,CXCL3,HMGCR,IL1B,LDLR,TLR4
PON1	phosphatase	Inhibited	-2	0.0362	CD68,HMOX1,MSR1,SCARB1
NOS2	enzyme	Inhibited	-2.157	0.107	Ccl2,CCL3L3,CD86,CXCL2,CXCL3,FOXO1,G6PC,IL1B,MAPK8
NR3C1	ligand-dependent nuclear receptor	Inhibited	-3.458	6.74e-07	ABCA1,ABI1,ACTB,ADH1C,ANGPTL4,APOA2,AS3MT,Ccl2,CCL3L3,CCL4,CCL5,COMT,CPS1,CXCL10,Cxcl9,DBI,DEGS1,EPB41L4B,FNTA,G6PC,GBP2,GNMT,HERPUD1,HGD,HMGCS2,HSD17B12,HSP90AB1,IDH1,IFIT2,IGF1,IGFALS,IGFBP1,IL1B,IL7R,MBD2,MEST,MKNK2,MMP13,MTHFD1,OAT,PCK1,PLIN2,PRPF40A,PSMA6,PTP4A2,RNF11,SERINC3,SERPINA1,SGK1,STUB1,TAT,Tgtp1/Tgtp2,TPST2,Trim30a/Trim30d,TSC22D3,YWHAE
